# Supplementary figures and images for: Altered Nasal Microbiota Composition Associated with Development of Polyserositis by Mycoplasma hyorhinis
Source: MDPI journal article supplement (doi:10.3390/pathogens10050603), 2021-05-14

**A**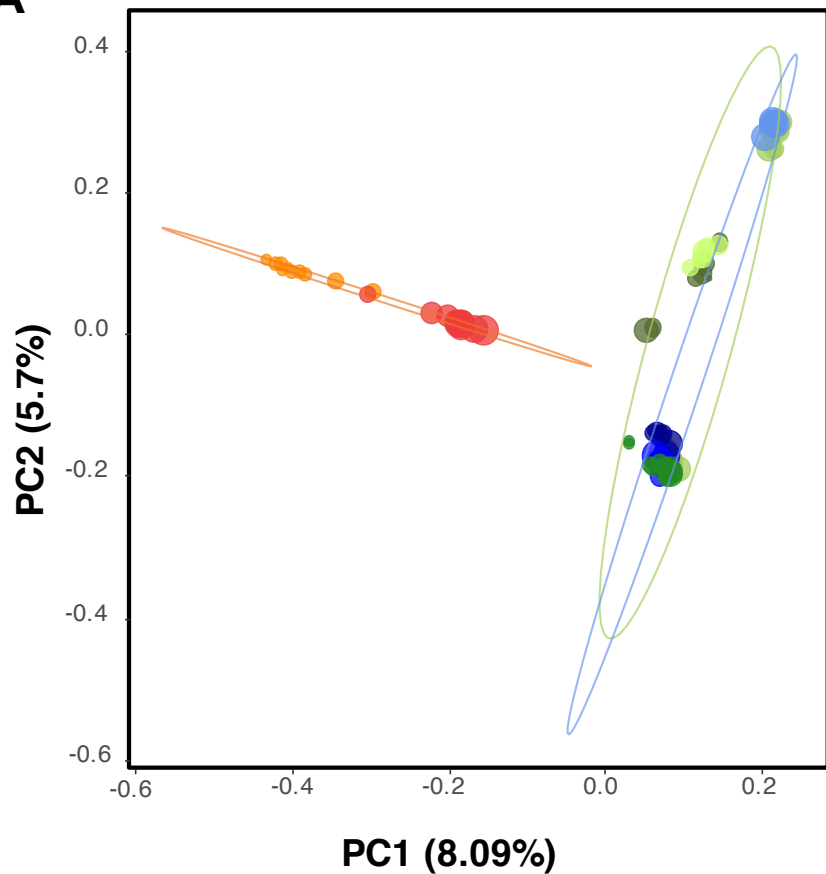**B**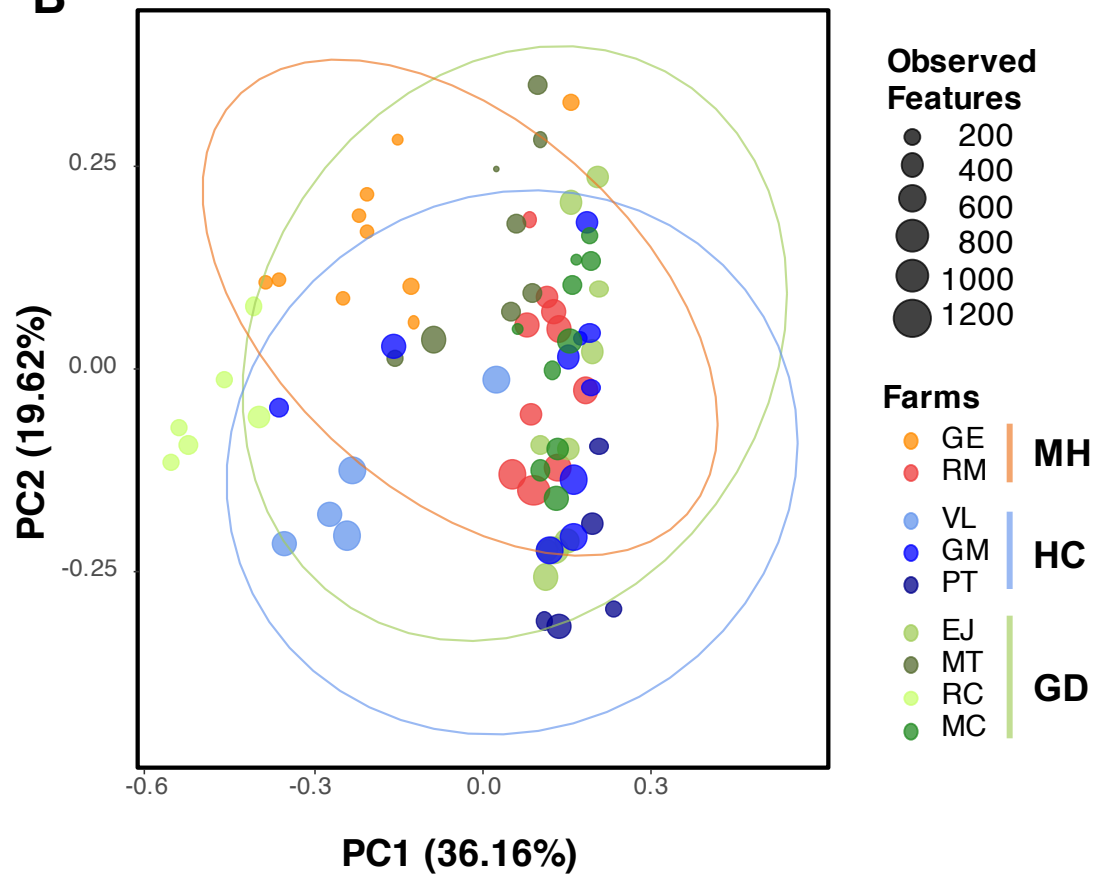

Supplement: s1 [file s1]
